# Supplementary material
Source: MDPI journal article supplement (https://www.mdpi.com/search?q=diversity-11-00166)
Supplement: s001 [file diversity-11-00166-s001.pdf]

**Supplementary table S1.** List of the sites and associated information.

| No. | Site name                            | Code     | Latitude (N) | Longitude (W) | Depth (m) | Habitat                | Sampling / processing details                                                                                                                                                                                                | Reference |
|-----|--------------------------------------|----------|--------------|---------------|-----------|------------------------|------------------------------------------------------------------------------------------------------------------------------------------------------------------------------------------------------------------------------|-----------|
| 1   | Calle 16 - <i>Lobophora</i>          | C16_Lob  | 23 07.73     | -82 25.24     | 9-21      | Macroalgae thallus     | Macroalgae thalli were carefully collected by hand using SCUBA diving and stored in nylon bags. Macroalgae belonged to 6 species (4 replicates each) and had different degree of fractal complexity. Mesh sieve: 45 µm       | [1]       |
| 2   | Calle 16 - <i>Dictyopteris</i>       | C16_Dic  | 23 07.73     | -82 25.24     | 9-21      | Macroalgae thallus     |                                                                                                                                                                                                                              |           |
| 3   | Calle 16 - <i>Amphiroa</i>           | C16_Amp  | 23 07.73     | -82 25.24     | 9-21      | Macroalgae thallus     |                                                                                                                                                                                                                              |           |
| 4   | Calle 16 - <i>Bryothamnion sp. 1</i> | C16_Bry1 | 23 07.73     | -82 25.24     | 9-21      | Macroalgae thallus     |                                                                                                                                                                                                                              |           |
| 5   | Calle 16 - <i>Bryothamnion sp. 2</i> | C16_Bry2 | 23 07.73     | -82 25.24     | 9-21      | Macroalgae thallus     |                                                                                                                                                                                                                              |           |
| 6   | Calle 16 - <i>Halimeda</i>           | C16_Hal  | 23 07.73     | -82 25.24     | 9-21      | Macroalgae thallus     |                                                                                                                                                                                                                              |           |
| 7   | Cave Emilio                          | C_Emi    | 22 46.43     | -82 41.52     | ~ 1       | Freshwater cave        | Sediment (ca. 5 l per cave) was collected by gently trawl jars along the sediment-water interface. Nematodes extracted from sediment by flotation in high density solution. Mesh sieve: 45 µm                                | [2]       |
| 8   | Cave El Agua                         | C_Agu    | 23 01.59     | -81 16.59     | ~ 1       | Freshwater cave        |                                                                                                                                                                                                                              |           |
| 9   | Cave Saturno                         | C_Sat    | 23 07.84     | -81 18.36     | ~ 20      | Freshwater cave        |                                                                                                                                                                                                                              |           |
| 10  | Cave El Brinco                       | C_Bri    | 22 04.32     | -81 03.22     | ~ 60      | Anchialine cave        |                                                                                                                                                                                                                              |           |
| 11  | Cave El Sitio                        | C_Sit    | 22 46.12     | -82 41.05     | ~ 1       | Freshwater cave        |                                                                                                                                                                                                                              |           |
| 12  | Cave El Tunel                        | C_Tun    | 22 50.43     | -82 24.39     | ~ 1       | Freshwater cave        |                                                                                                                                                                                                                              |           |
| 13  | Cienfuegos Bay - Station 5           | CB_5     | 22 07.48     | -80 29.55     | 12        | Unvegetated mud        | Cores of sediment (2.6 cm diameter, and 6 cm deep) were collected using SCUBA diving. 4 replicates per site in 3 sampling events. Nematodes extracted from sediment by flotation in high density solution. Mesh sieve: 45 µm | [3]       |
| 14  | Cienfuegos Bay - Station 7a          | CB_7a    | 22 10.09     | -80 30.47     | 10        | Unvegetated mud        |                                                                                                                                                                                                                              |           |
| 15  | Cienfuegos Bay - Station 10          | CB_10    | 22 09.19     | -80 27.16     | 5         | Unvegetated mud        |                                                                                                                                                                                                                              |           |
| 16  | Cienfuegos Bay - Station 12          | CB_12    | 22 07.55     | -80 27.23     | 9         | Unvegetated mud        |                                                                                                                                                                                                                              |           |
| 17  | Cienfuegos Bay - Station 12a         | CB_12a   | 22 07.55     | -80 27.23     | 5         | Unvegetated mud        |                                                                                                                                                                                                                              |           |
| 18  | Cienfuegos Bay - Station 15          | CB_15    | 22 05.33     | -80 26.00     | 14        | Unvegetated mud        |                                                                                                                                                                                                                              |           |
| 19  | Punta Francés                        | P1       | 21 37.13     | -83 11.40     | 2-4       | Coral degradation zone | All the dead coral fragments in the superficial 5–6 cm inside a frame of 10 cm × 10 cm were                                                                                                                                  | [4]       |
| 20  | Punta Francés                        | P2       | 21 35.80     | -83 10.36     | 2-4       | Coral degradation zone |                                                                                                                                                                                                                              |           |

|    |                                      |       |          |           |     |                        |                                                                                                                                                                                                                                                              |             |
|----|--------------------------------------|-------|----------|-----------|-----|------------------------|--------------------------------------------------------------------------------------------------------------------------------------------------------------------------------------------------------------------------------------------------------------|-------------|
| 21 | Ballenatos                           | B1    | 21 34.71 | -81 38.41 | 2-6 | Coral degradation zone | collected using SCUBA diving. Fragments were stored in jars and in the lab washed to remove the nematodes. Mesh sieve: 45 µm                                                                                                                                 |             |
| 22 | Ballenatos                           | B2    | 21 35.03 | -81 37.23 | 2-6 | Coral degradation zone |                                                                                                                                                                                                                                                              |             |
| 23 | Ballenatos                           | B3    | 21 34.96 | -81 35.84 | 2-6 | Coral degradation zone |                                                                                                                                                                                                                                                              |             |
| 24 | Ballenatos                           | B4    | 21 35.20 | -81 34.72 | 2-6 | Coral degradation zone |                                                                                                                                                                                                                                                              |             |
| 25 | Centro                               | C     | 23 21.10 | -82 20.38 | 12  | Unvegetated mud        | Sediment was collected with a box corer (0.037 m <sup>2</sup> of effective area) with 3 replicates per site. Two sampling events (2006 and 2016). No subsampling. Nematodes extracted from sediment by flotation in high density solution. Mesh sieve: 45 µm | Unpublished |
| 26 | Marimelena                           | M     | 23 08.07 | -82 20.08 | 12  | Unvegetated mud        |                                                                                                                                                                                                                                                              |             |
| 27 | Guasabacoa                           | G     | 23 07.23 | -82 20.34 | 9   | Unvegetated mud        |                                                                                                                                                                                                                                                              |             |
| 28 | Atares                               | A     | 23 07.23 | -82 21.18 | 10  | Unvegetated mud        |                                                                                                                                                                                                                                                              |             |
| 29 | Punta Francés                        | PF_SM | 21 36.00 | -83 03.00 | 2   | Seagrass meadow        | Seagrass as in 37–51, bare sand as in 13–18, coral degradation zone as in 21–24. Algal turf on hard substrate collected by hand within a plastic cylinder of 11 cm diameter, all the material stored in nylon bags. Mesh sieve: 45 µm                        | [5]         |
| 30 | Punta Francés                        | PF_BS | 21 36.00 | -83 03.00 | 3   | Bare sand              |                                                                                                                                                                                                                                                              |             |
| 31 | Punta Francés                        | PF_CR | 21 36.00 | -83 03.00 | 2   | Coral degradation zone |                                                                                                                                                                                                                                                              |             |
| 32 | Punta Francés                        | PF_AT | 21 36.00 | -83 03.00 | 2   | Algal turf             |                                                                                                                                                                                                                                                              |             |
| 33 | Cabezo de Moya                       | CM_SM | 21 36.00 | -83 10.00 | 2   | Seagrass meadow        |                                                                                                                                                                                                                                                              |             |
| 34 | Cabezo de Moya                       | CM_BS | 21 36.00 | -83 10.00 | 3   | Bare sand              |                                                                                                                                                                                                                                                              |             |
| 35 | Cabezo de Moya                       | CM_CR | 21 36.00 | -83 10.00 | 2   | Coral degradation zone |                                                                                                                                                                                                                                                              |             |
| 36 | Cabezo de Moya                       | CM_AT | 21 36.00 | -83 10.00 | 2   | Algal turf             |                                                                                                                                                                                                                                                              |             |
| 37 | Rincón de Guanabo                    | RG    | 23 10.62 | -82 05.95 | 2   | Seagrass meadow        | Cores of sediment (2.6 cm diameter, and 6 cm deep) were collected using SCUBA diving. 4 replicates per site. Nematodes extracted from sediment by flotation in high density solution. Mesh sieve: 45 µm                                                      | Unpublished |
| 38 | G. Guanahacabibes - Pasto Occidental | GG_14 | 22 00.58 | -84 48.78 | 5   | Seagrass meadow        |                                                                                                                                                                                                                                                              |             |
| 39 | G. Batabanó - Norte Traviesa         | GB_NT | 21 55.56 | -81 58.35 | 5   | Seagrass meadow        |                                                                                                                                                                                                                                                              |             |
| 40 | G. Batabanó - Canal C. Largo         | GB_CA | 21 36.52 | -81 34.95 | 3   | Seagrass meadow        |                                                                                                                                                                                                                                                              |             |
| 41 | G. Batabanó - Pasa de Rosario        | GB_CR | 21 38.03 | -81 56.34 | 1   | Seagrass meadow        |                                                                                                                                                                                                                                                              |             |
| 42 | G. Batabanó - Punta Gorda            | GB_PG | 22 21.90 | -82 10.30 | 3   | Seagrass meadow        |                                                                                                                                                                                                                                                              |             |

|    |                                 |           |          |           |      |                 |  |
|----|---------------------------------|-----------|----------|-----------|------|-----------------|--|
| 43 | G. Batabanó - Punta Francés     | GB_PF     | 21 37.00 | -83 11.59 | 2    | Seagrass meadow |  |
| 44 | G. Ana María - N Anclitas       | GA_NA     | 20 50.67 | -78 54.75 | 3    | Seagrass meadow |  |
| 45 | G. Ana María - N Caballones     | GA_NC     | 20 52.51 | -78 58.18 | 2    | Seagrass meadow |  |
| 46 | G. Ana María - Patana           | GA_PA     | 20 48.86 | -78 52.98 | 3    | Seagrass meadow |  |
| 47 | G. Ana María- S Algodón Grande  | GA_AGS    | 21 05.29 | -78 43.59 | 2    | Seagrass meadow |  |
| 48 | G. Ana María - N Algodón Grande | GA_AGN    | 21 06.34 | -78 43.21 | 2    | Seagrass meadow |  |
| 49 | Oriente S - Sierra Mar          | OS_SM     | 19 57.90 | -76 19.47 | 1    | Seagrass meadow |  |
| 50 | Oriente S - Farallón            | OS_F      | 19 54.57 | -77 12.04 | 1    | Seagrass meadow |  |
| 51 | Oriente N - Playa Caletones     | ON        | 21 12.32 | -76 14.20 | 1    | Seagrass meadow |  |
| 52 | Cabo de San Antonio             | WB 37-500 | 22 11.09 | -84 52.24 | 1209 | Deep water      |  |
| 53 | Mantua                          | WB 38-750 | 22 28.73 | -84 41.56 | 1670 | Deep water      |  |
| 54 | Cayo Jutía                      | WB 39-750 | 22 48.32 | -84 06.53 | 1296 | Deep water      |  |
| 55 | Cayo Levisa                     | WB 40-750 | 23 00.15 | -83 40.77 | 1580 | Deep water      |  |
| 56 | Bahía Honda B                   | WB 41-500 | 23 02.26 | -83 11.24 | 974  | Deep water      |  |
| 57 | Bahía Honda A                   | WB 41-750 | 23 05.13 | -83 11.82 | 1513 | Deep water      |  |
| 58 | Bahía Cabañas                   | WB 42-750 | 23 05.84 | -82 59.03 | 1420 | Deep water      |  |
| 59 | Bahía Mariel                    | WB 43-750 | 23 07.73 | -82 43.91 | 1535 | Deep water      |  |
| 60 | Bahía Habana                    | WB 44-750 | 23 14.37 | -82 20.35 | 1430 | Deep water      |  |

Three sediment cores (11.5 cm diameter) were collected from a single deployment of a multicorer per site. Top 5 cm of the sediment was analyzed. No subsampling was done. Meiofauna extracted from sediment by flotation in high density solution. Mesh size: 45 µm

Unpublished

**Supplementary table S2.** The five biological traits associated to each nematode species.

| Species                            | c-p value | Trophic group | Amphidial fovea shape | Cuticle             | Tail shape                 |
|------------------------------------|-----------|---------------|-----------------------|---------------------|----------------------------|
| <i>Acantholaimus maks</i>          | 3         | 2A            | circular              | punctated/annulated | elongated/filiform         |
| <i>Acantholaimus megamphis</i>     | 3         | 2A            | circular              | punctated/annulated | elongated/filiform         |
| <i>Acanthonchus cobbi</i>          | 3         | 2A            | spiral                | punctated/annulated | conical                    |
| <i>Acanthonchus pungionatus</i>    | 3         | 2A            | spiral                | punctated/annulated | conical                    |
| <i>Acanthonchus rostratus</i>      | 3         | 2A            | spiral                | punctated/annulated | conical                    |
| <i>Acanthonchus sp.</i>            | 3         | 2A            | spiral                | punctated/annulated | conical                    |
| <i>Acanthonchus viviparus</i>      | 3         | 2A            | spiral                | punctated/annulated | conical                    |
| <i>Acanthopharynx denticulata</i>  | 3         | 2A            | spiral                | punctated/annulated | conical                    |
| <i>Acanthopharynx rigida</i>       | 3         | 2A            | spiral                | punctated/annulated | conical                    |
| <i>Actinonema fidatum</i>          | 3         | 2A            | slit-like             | punctated/annulated | elongated/filiform         |
| <i>Actinonema longicaudatum</i>    | 3         | 2A            | slit-like             | punctated/annulated | elongated/filiform         |
| <i>Actinonema pachydermatum</i>    | 3         | 2A            | slit-like             | punctated/annulated | elongated/filiform         |
| <i>Adoncholaimus sp.</i>           | 4         | 2B            | pocket                | smooth              | clavate/conico-cylindrical |
| <i>Aegialolaimus tenuicaudatus</i> | 4         | 1A            | circular              | smooth              | conical                    |
| <i>Aegialolaimus sp.</i>           | 4         | 1A            | circular              | smooth              | conical                    |
| <i>Ammotheristus sp.</i>           | 2         | 1B            | circular              | punctated/annulated | conical                    |
| <i>Amphimonhystera sp.</i>         | 2         | 1B            | circular              | punctated/annulated | conical                    |
| <i>Amphimonhystrella megastoma</i> | 2         | 1B            | circular              | punctated/annulated | conical                    |
| <i>Anoplostoma viviparum</i>       | 2         | 1B            | pocket                | smooth              | clavate/conico-cylindrical |
| <i>Anoplostoma sp.</i>             | 2         | 1B            | pocket                | smooth              | clavate/conico-cylindrical |
| <i>Anticoma lata</i>               | 2         | 1B            | pocket                | smooth              | elongated/filiform         |
| <i>Anticoma sp.</i>                | 2         | 1B            | pocket                | smooth              | elongated/filiform         |
| <i>Anticoma trichura</i>           | 2         | 1B            | pocket                | smooth              | elongated/filiform         |
| <i>Apenodraconema chlidosis</i>    | 4         | 1A            | spiral                | punctated/annulated | conical                    |
| <i>Aphanolaimus sp.</i>            |           | 1A            | circular              | punctated/annulated | conical                    |
| <i>Aponchium cylindricolle</i>     | 3         | 2A            | circular              | punctated/annulated | conical                    |
| <i>Aponchium sp.</i>               | 3         | 2A            | circular              | punctated/annulated | conical                    |

|                                  |   |    |                        |                        |                            |
|----------------------------------|---|----|------------------------|------------------------|----------------------------|
| <i>Aponema sp.</i>               | 3 | 2A | circular               | punctated/annulated    | clavate/conico-cylindrical |
| <i>Aponema torosum</i>           | 3 | 2A | circular               | punctated/annulated    | clavate/conico-cylindrical |
| <i>Araeolaimus boomerangifer</i> | 3 | 1A | rounded/elongated loop | punctated/annulated    | conical                    |
| <i>Araeolaimus elegans</i>       | 3 | 1A | rounded/elongated loop | punctated/annulated    | conical                    |
| <i>Astomonema sp.</i>            | 3 | -  | circular               | punctated/annulated    | conical                    |
| <i>Bathyepsilonema sp.</i>       | 4 | 2A | spiral                 | punctated/annulated    | conical                    |
| <i>Bathyeurystomina sp.</i>      | 4 | 2B | indistinct             | smooth                 | clavate/conico-cylindrical |
| <i>Bodonema vossi</i>            |   | 1A | circular               | smooth                 | conical                    |
| <i>Bolbolaimus riemanni</i>      | 3 | 2A | circular               | punctated/annulated    | conical                    |
| <i>Bolbolaimus sp.</i>           | 3 | 2A | circular               | punctated/annulated    | conical                    |
| <i>Bolbonema sp.</i>             | 3 | 2A | circular               | punctated/annulated    | conical                    |
| <i>Calomicrolaimus sp.</i>       | 3 | 2A | circular               | punctated/annulated    | conical                    |
| <i>Calyptronema acuminatum</i>   | 4 | 2A | pocket                 | smooth                 | conical                    |
| <i>Camacolaimus longicauda</i>   | 3 | 2A | spiral                 | punctated/annulated    | conical                    |
| <i>Campylaimus sp.</i>           | 3 | 1A | rounded/elongated loop | punctated/annulated    | clavate/conico-cylindrical |
| <i>Cephalanticoma chitwoodi</i>  | 2 | 2A | pocket                 | smooth                 | elongated/filiform         |
| <i>Cephalanticoma sp.</i>        | 2 | 2A | pocket                 | smooth                 | elongated/filiform         |
| <i>Ceramonema attenuatum</i>     | 3 | 1A | rounded/elongated loop | body annules w/ ridges | conical                    |
| <i>Ceramonema carinatum</i>      | 3 | 1A | rounded/elongated loop | body annules w/ ridges | conical                    |
| <i>Ceramonema filipjevi</i>      | 3 | 1A | rounded/elongated loop | body annules w/ ridges | conical                    |
| <i>Ceramonema reticulatum</i>    | 3 | 1A | rounded/elongated loop | body annules w/ ridges | conical                    |
| <i>Ceramonema sp.</i>            | 3 | 1A | rounded/elongated loop | body annules w/ ridges | conical                    |
| <i>Ceramonema yunfengi</i>       | 3 | 1A | rounded/elongated loop | body annules w/ ridges | conical                    |
| <i>Cervonema macramphis</i>      | 2 | 1A | spiral                 | punctated/annulated    | clavate/conico-cylindrical |
| <i>Cheironchus sp.</i>           | 3 | 2B | spiral                 | punctated/annulated    | conical                    |
| <i>Cheironchus vorax</i>         | 3 | 2B | spiral                 | punctated/annulated    | conical                    |
| <i>Choanolaimus psammophilus</i> | 3 | 2B | spiral                 | punctated/annulated    | conical                    |
| <i>Chromadora brevipapillata</i> | 3 | 2A | slit-like              | punctated/annulated    | conical                    |
| <i>Chromadora macrolaimoides</i> | 3 | 2A | slit-like              | punctated/annulated    | conical                    |
| <i>Chromadora nudicapitata</i>   | 3 | 2A | slit-like              | punctated/annulated    | conical                    |
| <i>Chromadorella filiformis</i>  | 3 | 2A | slit-like              | punctated/annulated    | conical                    |

|                                      |   |    |                        |                     |                            |
|--------------------------------------|---|----|------------------------|---------------------|----------------------------|
| <i>Chromadorella macris</i>          | 3 | 2A | slit-like              | punctated/annulated | conical                    |
| <i>Chromadorella paramucrodonata</i> | 3 | 2A | slit-like              | punctated/annulated | conical                    |
| <i>Chromadorella sp.</i>             | 3 | 2A | slit-like              | punctated/annulated | conical                    |
| <i>Chromadorina sp.</i>              | 3 | 2A | slit-like              | punctated/annulated | conical                    |
| <i>Chromadorita sp.</i>              | 3 | 2A | slit-like              | punctated/annulated | conical                    |
| <i>Chromadorita tenuis</i>           | 3 | 2A | slit-like              | punctated/annulated | conical                    |
| <i>Chromaspirina inglisi</i>         | 3 | 2A | spiral                 | punctated/annulated | conical                    |
| <i>Chromaspirina sp.</i>             | 3 | 2A | spiral                 | punctated/annulated | conical                    |
| <i>Cienfuegia cachoi</i>             | 2 | 1B | circular               | punctated/annulated | elongated/filiform         |
| <i>Cobbia cf. caledonia</i>          | 3 | 2A | circular               | punctated/annulated | conical                    |
| <i>Cobbia sp.</i>                    | 3 | 2A | circular               | punctated/annulated | conical                    |
| <i>Comesa warwicki</i>               | 3 | 2A | spiral                 | punctated/annulated | conical                    |
| <i>Comesoma arenae</i>               | 2 | 2A | spiral                 | punctated/annulated | clavate/conico-cylindrical |
| <i>Comesoma sp.</i>                  | 2 | 2A | spiral                 | punctated/annulated | clavate/conico-cylindrical |
| <i>Crenopharynx marioni</i>          | 4 | 1A | pocket                 | smooth              | elongated/filiform         |
| <i>Crenopharynx paralepturus</i>     | 4 | 1A | pocket                 | smooth              | elongated/filiform         |
| <i>Crenopharynx sp.</i>              | 4 | 1A | pocket                 | smooth              | elongated/filiform         |
| <i>Cricolaimus elongatus</i>         |   | 2A | rounded/elongated loop | punctated/annulated | conical                    |
| <i>Croconema cinctum</i>             | 2 | 2A | rounded/elongated loop | punctated/annulated | conical                    |
| <i>Croconema mawsoni</i>             | 2 | 2A | rounded/elongated loop | punctated/annulated | conical                    |
| <i>Croconema sp.</i>                 | 2 | 2A | rounded/elongated loop | punctated/annulated | conical                    |
| <i>Cyartonema germanicum</i>         | 4 | 1A | circular               | punctated/annulated | clavate/conico-cylindrical |
| <i>Cyatholaimus sp.</i>              | 3 | 2A | spiral                 | punctated/annulated | conical                    |
| <i>Cylicolaimus magnus</i>           | 5 | 2B | pocket                 | smooth              | short/blunt                |
| <i>Cylicolaimus sp.</i>              | 5 | 2B | pocket                 | smooth              | short/blunt                |
| <i>Daptonema longicaudatus</i>       | 2 | 1B | circular               | punctated/annulated | elongated/filiform         |
| <i>Daptonema longissimecaudatus</i>  | 2 | 1B | circular               | punctated/annulated | elongated/filiform         |
| <i>Daptonema normandicum</i>         | 2 | 1B | circular               | punctated/annulated | clavate/conico-cylindrical |
| <i>Daptonema oxycerca</i>            | 2 | 1B | circular               | punctated/annulated | clavate/conico-cylindrical |
| <i>Daptonema proprium</i>            | 2 | 1B | circular               | punctated/annulated | elongated/filiform         |
| <i>Daptonema sp.</i>                 | 2 | 1B | circular               | punctated/annulated | clavate/conico-cylindrical |

|                                    |   |    |                        |                        |                            |
|------------------------------------|---|----|------------------------|------------------------|----------------------------|
| <i>Dasynemoides sp.</i>            | 3 | 1A | rounded/elongated loop | body annules w/ ridges | conical                    |
| <i>Demonema rapax</i>              | 3 | 2B | spiral                 | punctated/annulated    | elongated/filiform         |
| <i>Demonema sp.</i>                | 3 | 2B | spiral                 | punctated/annulated    | elongated/filiform         |
| <i>Deontolaimus sp.</i>            | 3 | 2B | circular               | punctated/annulated    | conical                    |
| <i>Desmodora deconincki</i>        | 2 | 2A | spiral                 | punctated/annulated    | conical                    |
| <i>Desmodora pilosa</i>            | 2 | 2A | spiral                 | punctated/annulated    | conical                    |
| <i>Desmodora pontica</i>           | 2 | 2A | spiral                 | punctated/annulated    | conical                    |
| <i>Desmodora scaldensis</i>        | 2 | 2A | spiral                 | punctated/annulated    | conical                    |
| <i>Desmodora sp.</i>               | 2 | 2A | spiral                 | punctated/annulated    | conical                    |
| <i>Desmodorella balteata</i>       | 3 | 2A | spiral                 | punctated/annulated    | conical                    |
| <i>Desmodorella tenuispiculum</i>  | 3 | 2A | spiral                 | punctated/annulated    | conical                    |
| <i>Desmolaimus brasiliensis</i>    | 2 | 1B | circular               | punctated/annulated    | conical                    |
| <i>Desmolaimus sp.</i>             | 2 | 1B | circular               | punctated/annulated    | conical                    |
| <i>Desmoscolex sp.</i>             | 4 | 1A | circular               | desmens                | conical                    |
| <i>Dichromadora amphidiscoides</i> | 2 | 2A | circular               | punctated/annulated    | elongated/filiform         |
| <i>Dichromadora apapillata</i>     | 2 | 2A | slit-like              | punctated/annulated    | conical                    |
| <i>Dichromadora sp.</i>            | 2 | 2A | slit-like              | punctated/annulated    | conical                    |
| <i>Didelta maculatum</i>           | 2 | 1B | rounded/elongated loop | punctated/annulated    | elongated/filiform         |
| <i>Didelta scutatatum</i>          | 2 | 1B | rounded/elongated loop | punctated/annulated    | elongated/filiform         |
| <i>Didelta scutellatum</i>         | 2 | 1B | rounded/elongated loop | punctated/annulated    | elongated/filiform         |
| <i>Didelta sp.</i>                 | 2 | 1B | rounded/elongated loop | punctated/annulated    | elongated/filiform         |
| <i>Diplolaimelloides sp.</i>       | 1 | 1B | circular               | punctated/annulated    | elongated/filiform         |
| <i>Diplopeltis cirrhatus</i>       | 3 | 1A | rounded/elongated loop | punctated/annulated    | conical                    |
| <i>Diplopeltoides sp.</i>          | 3 | 1A | rounded/elongated loop | punctated/annulated    | conical                    |
| <i>Diplopeltula sp.</i>            | 3 | 1A | rounded/elongated loop | punctated/annulated    | conical                    |
| <i>Disconema longicaudatum</i>     | 2 | 1A | rounded/elongated loop | punctated/annulated    | elongated/filiform         |
| <i>Disconema suecicum</i>          | 2 | 1A | rounded/elongated loop | punctated/annulated    | clavate/conico-cylindrical |
| <i>Disconema sp.</i>               | 2 | 1A | rounded/elongated loop | punctated/annulated    | clavate/conico-cylindrical |
| <i>Doliolaimus sp.</i>             | 3 | 2B | Circular               | punctated/annulated    | conical                    |
| <i>Dorylaimopsis punctata</i>      | 2 | 2B | spiral                 | punctated/annulated    | clavate/conico-cylindrical |
| <i>Dorylaimopsis sp.</i>           | 2 | 2B | spiral                 | punctated/annulated    | clavate/conico-cylindrical |

|                                  |   |    |                        |                     |                            |
|----------------------------------|---|----|------------------------|---------------------|----------------------------|
| <i>Draconema sp.</i>             | 4 | 1A | rounded/elongated loop | punctated/annulated | conical                    |
| <i>Elzalia floresii</i>          | 2 | 1B | circular               | punctated/annulated | clavate/conico-cylindrical |
| <i>Elzalia sp.</i>               | 2 | 1B | circular               | punctated/annulated | clavate/conico-cylindrical |
| <i>Enchonema umbrosum</i>        | 2 | 1B | circular               | punctated/annulated | clavate/conico-cylindrical |
| <i>Endeolophos fossiferus</i>    | 3 | 2A | slit-like              | punctated/annulated | conical                    |
| <i>Endeolophos minutus</i>       | 3 | 2A | slit-like              | punctated/annulated | conical                    |
| <i>Enoploides bisulcus</i>       | 2 | 2B | indistinct             | punctated/annulated | clavate/conico-cylindrical |
| <i>Enoploides longicaudatus</i>  | 2 | 2B | indistinct             | punctated/annulated | clavate/conico-cylindrical |
| <i>Enoploides sp.</i>            | 2 | 2B | indistinct             | punctated/annulated | clavate/conico-cylindrical |
| <i>Enoplolaimus mus</i>          | 2 | 2B | indistinct             | smooth              | clavate/conico-cylindrical |
| <i>Enoplolaimus regius</i>       | 2 | 2B | indistinct             | smooth              | clavate/conico-cylindrical |
| <i>Enoplolaimus sp.</i>          | 2 | 2B | indistinct             | smooth              | clavate/conico-cylindrical |
| <i>Enoplus sp.</i>               | 5 | 2B | indistinct             | smooth              | clavate/conico-cylindrical |
| <i>Epacanthion galeatum</i>      | 2 | 2B | indistinct             | smooth              | clavate/conico-cylindrical |
| <i>Epsilonema sp.</i>            | 4 | 1A | spiral                 | punctated/annulated | conical                    |
| <i>Ethmolaimus sp.</i>           | 3 | 2A | spiral                 | punctated/annulated | conical                    |
| <i>Eubostrichus hopperi</i>      | 3 | 1A | spiral                 | bacteria covering   | conical                    |
| <i>Eubostrichus sp.</i>          | 3 | 1A | spiral                 | bacteria covering   | conical                    |
| <i>Euchromadora atypica</i>      | 3 | 2A | indistinct             | punctated/annulated | conical                    |
| <i>Euchromadora gaulica</i>      | 3 | 2A | indistinct             | punctated/annulated | conical                    |
| <i>Euchromadora sp.</i>          | 3 | 2A | indistinct             | punctated/annulated | conical                    |
| <i>Euchromadora vulgaris</i>     | 3 | 2A | indistinct             | punctated/annulated | conical                    |
| <i>Eudorylaimus granuliferus</i> | 4 | 2B | indistinct             | smooth              | short/blunt                |
| <i>Eumorpholaimus sp.</i>        | 2 | 1B | circular               | punctated/annulated | clavate/conico-cylindrical |
| <i>Eurystomina minutisculae</i>  | 4 | 2B | slit-like              | smooth              | conical                    |
| <i>Eurystomina sp.</i>           | 4 | 2B | slit-like              | smooth              | conical                    |
| <i>Eurystomina sudensis</i>      | 4 | 2B | slit-like              | smooth              | conical                    |
| <i>Filitonchus ewensis</i>       | 3 | 2A | spiral                 | punctated/annulated | conical                    |
| <i>Filoncholaimus prolatus</i>   | 4 | 2B | pocket                 | smooth              | elongated/filiform         |
| <i>Gammanema sp.</i>             | 3 | 2B | spiral                 | punctated/annulated | elongated/filiform         |
| <i>Geomonhystera sp.</i>         | 1 | 1B | circular               | punctated/annulated | conical                    |

|                                                 |   |    |                        |                                                   |                            |
|-------------------------------------------------|---|----|------------------------|---------------------------------------------------|----------------------------|
| <i>Glochinema sp.</i>                           | 4 | 1A | spiral                 | punctated/annulated                               | conical                    |
| <i>Gnomoxyala sp.</i>                           | 2 | 1B | circular               | punctated/annulated                               | clavate/conico-cylindrical |
| <i>Gomphonema typicum</i>                       | 3 | 2A | spiral                 | punctated/annulated                               | conical                    |
| <i>Graphonema sp.</i>                           | 3 | 2A | slit-like              | punctated/annulated                               | conical                    |
| <i>Greeffiella dasyura</i>                      | 4 | 1A | circular               | punctated/annulated                               | conical                    |
| <i>Greeffiella sp.</i>                          | 4 | 1A | circular               | punctated/annulated                               | conical                    |
| <i>Halalaimus anne</i>                          | 4 | 1A | longitudinal slit      | punctated/annulated                               | elongated/filiform         |
| <i>Halalaimus bulbocaudatus</i>                 | 4 | 1A | longitudinal slit      | punctated/annulated                               | elongated/filiform         |
| <i>Halalaimus curvicaudatus</i>                 | 4 | 1A | longitudinal slit      | punctated/annulated                               | elongated/filiform         |
| <i>Halalaimus filicollis</i>                    | 4 | 1A | longitudinal slit      | punctated/annulated                               | elongated/filiform         |
| <i>Halalaimus floridanus</i>                    | 4 | 1A | longitudinal slit      | punctated/annulated                               | elongated/filiform         |
| <i>Halalaimus gracilis</i>                      | 4 | 1A | longitudinal slit      | punctated/annulated                               | elongated/filiform         |
| <i>Halalaimus monstrocaudatus</i>               | 4 | 1A | longitudinal slit      | punctated/annulated                               | elongated/filiform         |
| <i>Halichoanolaimus chordiurus</i>              | 3 | 2B | spiral                 | punctated/annulated                               | elongated/filiform         |
| <i>Halichoanolaimus duodecimpapillatus</i>      | 3 | 2B | spiral                 | punctated/annulated                               | elongated/filiform         |
| <i>Halichoanolaimus filicauda</i>               | 3 | 2B | spiral                 | punctated/annulated                               | elongated/filiform         |
| <i>Halichoanolaimus macrophallus</i>            | 3 | 2B | spiral                 | punctated/annulated                               | elongated/filiform         |
| <i>Halichoanolaimus quattuordecimpapillatus</i> | 3 | 2B | spiral                 | punctated/annulated                               | elongated/filiform         |
| <i>Halichoanolaimus sp.</i>                     | 3 | 2B | spiral                 | punctated/annulated                               | elongated/filiform         |
| <i>Haliplectus sp.</i>                          | 3 | 1A | circular               | punctated/annulated                               | conical                    |
| <i>Hopperia muscatensis</i>                     | 2 | 2B | spiral                 | punctated/annulated                               | clavate/conico-cylindrical |
| <i>Hopperia sp.</i>                             | 2 | 2B | spiral                 | punctated/annulated                               | clavate/conico-cylindrical |
| <i>Innocuonema asymmetricum</i>                 | 3 | 2A | slit-like              | punctated/annulated                               | conical                    |
| <i>Intasia nojii</i>                            | 3 | 1A | rounded/elongated loop | punctated/annulated                               | conical                    |
| <i>Ironus ignavus</i>                           | 4 | 2B | pocket                 | smooth                                            | elongated/filiform         |
| <i>Laimella longicaudata</i>                    | 2 | 2A | spiral                 | punctated/annulated                               | clavate/conico-cylindrical |
| <i>Latronema sp.</i>                            | 3 | 2B | spiral                 | punctated/annulated w/<br>longitudinal structures | conical                    |
| <i>Laxus cosmopolitus</i>                       | 3 | 1A | spiral                 | bacteria covering                                 | conical                    |
| <i>Laxus parvum</i>                             | 3 | 1A | spiral                 | bacteria covering                                 | conical                    |
| <i>Laxus sp.</i>                                | 3 | 1A | spiral                 | bacteria covering                                 | conical                    |

|                                        |   |    |            |                     |                            |
|----------------------------------------|---|----|------------|---------------------|----------------------------|
| <i>Ledovitia sp.</i>                   | 4 | 2B | pocket     | smooth              | clavate/conico-cylindrical |
| <i>Leptepsilonema richardi</i>         | 4 | 1A | spiral     | punctated/annulated | conical                    |
| <i>Leptepsilonema sp.</i>              | 4 | 1A | spiral     | punctated/annulated | conical                    |
| <i>Leptolaimus acicula</i>             | 2 | 1A | circular   | punctated/annulated | elongated/filiform         |
| <i>Leptolaimus danicus</i>             | 2 | 1A | circular   | punctated/annulated | clavate/conico-cylindrical |
| <i>Leptolaimus papilliger</i>          | 2 | 1A | circular   | punctated/annulated | clavate/conico-cylindrical |
| <i>Leptonemella brevipharynx</i>       | 3 | 1A | spiral     | bacteria covering   | conical                    |
| <i>Leptonemella cincta</i>             | 3 | 1A | spiral     | bacteria covering   | conical                    |
| <i>Leptosomatum sp.</i>                | 5 | 1A | pocket     | smooth              | short/blunt                |
| <i>Linhomoeus dolichocaudatus</i>      | 2 | 1B | circular   | punctated/annulated | elongated/filiform         |
| <i>Linhomoeus dolichurus</i>           | 2 | 1B | circular   | punctated/annulated | elongated/filiform         |
| <i>Linhomoeus elongatus</i>            | 2 | 1B | circular   | punctated/annulated | conical                    |
| <i>Linhomoeus lepturus</i>             | 2 | 1B | circular   | punctated/annulated | clavate/conico-cylindrical |
| <i>Linhomoeus paralongicaudatus</i>    | 2 | 1B | circular   | punctated/annulated | elongated/filiform         |
| <i>Linhomoeus sp.</i>                  | 2 | 1B | circular   | punctated/annulated | clavate/conico-cylindrical |
| <i>Linhystera problematica</i>         | 2 | 1A | circular   | punctated/annulated | clavate/conico-cylindrical |
| <i>Linhystera sp.</i>                  | 2 | 1A | circular   | punctated/annulated | clavate/conico-cylindrical |
| <i>Longicyatholaimus capsulatus</i>    | 3 | 2A | spiral     | punctated/annulated | elongated/filiform         |
| <i>Longicyatholaimus egregius</i>      | 3 | 2A | spiral     | punctated/annulated | elongated/filiform         |
| <i>Longicyatholaimus longicaudatus</i> | 3 | 2A | spiral     | punctated/annulated | elongated/filiform         |
| <i>Longicyatholaimus sp.</i>           | 3 | 2A | spiral     | punctated/annulated | elongated/filiform         |
| <i>Lyranema sp.</i>                    | 4 | 2B | slit-like  | smooth              | clavate/conico-cylindrical |
| <i>Manganonema sp.</i>                 | 2 | 1A | circular   | punctated/annulated | clavate/conico-cylindrical |
| <i>Marylynnia annae</i>                | 3 | 2A | spiral     | punctated/annulated | clavate/conico-cylindrical |
| <i>Marylynnia eratos</i>               | 3 | 2A | spiral     | punctated/annulated | clavate/conico-cylindrical |
| <i>Marylynnia johanseni</i>            | 3 | 2A | spiral     | punctated/annulated | elongated/filiform         |
| <i>Marylynnia sp.</i>                  | 3 | 2A | spiral     | punctated/annulated | elongated/filiform         |
| <i>Megadesmolaimus sp.</i>             | 2 | 1B | circular   | punctated/annulated | clavate/conico-cylindrical |
| <i>Megadesmolaimus uncinatus</i>       | 2 | 1B | circular   | punctated/annulated | conical                    |
| <i>Mesacanthion sp.</i>                | 3 | 2B | indistinct | smooth              | clavate/conico-cylindrical |
| <i>Mesacanthoides psittacus</i>        | 2 | 2B | indistinct | punctated/annulated | clavate/conico-cylindrical |

|                                        |   |    |                        |                                                   |                            |
|----------------------------------------|---|----|------------------------|---------------------------------------------------|----------------------------|
| <i>Metachromadora pulvoinata</i>       | 2 | 2A | spiral                 | punctated/annulated                               | conical                    |
| <i>Metachromadora sp.</i>              | 2 | 2A | spiral                 | punctated/annulated                               | conical                    |
| <i>Metacomesoma sp.</i>                | 2 | 1B | spiral                 | punctated/annulated                               | clavate/conico-cylindrical |
| <i>Metacyatholaimus chabaudi</i>       | 2 | 2A | spiral                 | punctated/annulated                               | elongated/filiform         |
| <i>Metacyatholaimus effilatus</i>      | 2 | 2A | spiral                 | punctated/annulated                               | elongated/filiform         |
| <i>Metadasynemella cassidiniensis</i>  | 3 | 1A | rounded/elongated loop | body annules w/ ridges                            | conical                    |
| <i>Metadasynemella falciphalla</i>     | 3 | 1A | rounded/elongated loop | body annules w/ ridges                            | conical                    |
| <i>Metadasynemella sp.</i>             | 3 | 1A | rounded/elongated loop | body annules w/ ridges                            | conical                    |
| <i>Metadesmolaimus coronatus</i>       | 2 | 1B | circular               | punctated/annulated                               | clavate/conico-cylindrical |
| <i>Metadesmolaimus sp.</i>             | 2 | 1B | circular               | punctated/annulated                               | clavate/conico-cylindrical |
| <i>Metalinhomoeus biformis</i>         | 2 | 1B | circular               | punctated/annulated                               | elongated/filiform         |
| <i>Metalinhomoeus effilatus</i>        | 2 | 1B | circular               | punctated/annulated                               | elongated/filiform         |
| <i>Metalinhomoeus flagellicaudatus</i> | 2 | 1B | circular               | punctated/annulated                               | elongated/filiform         |
| <i>Metalinhomoeus sp.</i>              | 2 | 1B | circular               | punctated/annulated                               | elongated/filiform         |
| <i>Metalinhomoeus variabilis</i>       | 2 | 1B | circular               | punctated/annulated                               | conical                    |
| <i>Metasphaerolaimus crassicauda</i>   | 3 | 2B | Circular               | punctated/annulated                               | conical                    |
| <i>Metasphaerolaimus sp.</i>           | 3 | 2B | Circular               | punctated/annulated                               | conical                    |
| <i>Metepsilonema sp.</i>               | 4 | 1A | spiral                 | punctated/annulated                               | conical                    |
| <i>Meyersia major</i>                  | 4 | 2B | pocket                 | smooth                                            | clavate/conico-cylindrical |
| <i>Micoletzkyia elegans</i>            | 4 | 1A | pocket                 | smooth                                            | elongated/filiform         |
| <i>Micoletzkyia sp.</i>                | 4 | 1A | pocket                 | smooth                                            | elongated/filiform         |
| <i>Microlaimus cyatholaimoides</i>     | 3 | 2A | circular               | punctated/annulated                               | conical                    |
| <i>Microlaimus sp.</i>                 | 3 | 2A | circular               | punctated/annulated                               | conical                    |
| <i>Minolaimus sp.</i>                  | 2 | 1A | spiral                 | punctated/annulated                               | elongated/filiform         |
| <i>Molgolaimus cuanensis</i>           | 2 | 2A | spiral                 | punctated/annulated                               | clavate/conico-cylindrical |
| <i>Monhysteroides bulbiferus</i>       | 2 | 1A | circular               | punctated/annulated                               | elongated/filiform         |
| <i>Monhysteroides macramphidus</i>     | 2 | 1A | circular               | punctated/annulated                               | elongated/filiform         |
| <i>Monhystrella sp.</i>                | 1 | 1A | circular               | punctated/annulated                               | elongated/filiform         |
| <i>Monoposthia mirabilis</i>           | 3 | 2A | circular               | punctated/annulated w/<br>longitudinal structures | conical                    |
| <i>Nannolaimoides sp.</i>              | 3 | 2A | spiral                 | punctated/annulated                               | conical                    |

|                                          |   |    |                        |                     |                            |
|------------------------------------------|---|----|------------------------|---------------------|----------------------------|
| <i>Nannolaimus phaleratus</i>            | 3 | 2A | spiral                 | punctated/annulated | conical                    |
| <i>Nemanema sp.</i>                      | 4 | 1A | pocket                 | punctated/annulated | conical                    |
| <i>Neochromadora nicolae</i>             | 2 | 2A | slit-like              | punctated/annulated | conical                    |
| <i>Neochromadora oshoroana</i>           | 2 | 2A | slit-like              | punctated/annulated | conical                    |
| <i>Neotonchus sp.</i>                    | 2 | 2A | spiral                 | punctated/annulated | conical                    |
| <i>Odontophora bermudensis</i>           | 2 | 2B | rounded/elongated loop | punctated/annulated | conical                    |
| <i>Odontophora sp.</i>                   | 2 | 2B | rounded/elongated loop | punctated/annulated | conical                    |
| <i>Onchium sp.</i>                       | 3 | 2B | circular               | punctated/annulated | conical                    |
| <i>Oncholaimellus sp.</i>                | 3 | 2B | pocket                 | smooth              | clavate/conico-cylindrical |
| <i>Oxyonchus sp.</i>                     | 2 | 2B | indistinct             | smooth              | clavate/conico-cylindrical |
| <i>Oxystomina affinis</i>                | 4 | 1A | pocket                 | punctated/annulated | clavate/conico-cylindrical |
| <i>Oxystomina sp.</i>                    | 4 | 1A | pocket                 | punctated/annulated | clavate/conico-cylindrical |
| <i>Paracanthonchus austrospectabilis</i> | 2 | 2A | spiral                 | punctated/annulated | conical                    |
| <i>Paracanthonchus breviseta</i>         | 2 | 2A | spiral                 | punctated/annulated | conical                    |
| <i>Paracanthonchus longicaudatus</i>     | 2 | 2A | spiral                 | punctated/annulated | elongated/filiform         |
| <i>Paracanthonchus perspicuus</i>        | 2 | 2A | spiral                 | punctated/annulated | conical                    |
| <i>Paracanthonchus platypus</i>          | 2 | 2A | spiral                 | punctated/annulated | conical                    |
| <i>Paracanthonchus sp.</i>               | 2 | 2A | spiral                 | punctated/annulated | conical                    |
| <i>Paracomesoma dubium</i>               | 2 | 2A | spiral                 | punctated/annulated | clavate/conico-cylindrical |
| <i>Paracomesoma sp.</i>                  | 2 | 2A | spiral                 | punctated/annulated | clavate/conico-cylindrical |
| <i>Paracyatholaimoides multispiralis</i> | 3 | 2A | spiral                 | punctated/annulated | conical                    |
| <i>Paracyatholaimoides sp.</i>           | 3 | 2A | spiral                 | punctated/annulated | conical                    |
| <i>Paracyatholaimus helicellus</i>       | 2 | 2A | spiral                 | punctated/annulated | conical                    |
| <i>Paracyatholaimus oistospiculoides</i> | 2 | 2A | spiral                 | punctated/annulated | conical                    |
| <i>Paradesmodora immersa</i>             | 3 | 2A | spiral                 | punctated/annulated | conical                    |
| <i>Paradesmodora campbelli</i>           | 3 | 2A | spiral                 | punctated/annulated | conical                    |
| <i>Paradraconema sp.</i>                 | 4 | 1A | rounded/elongated loop | punctated/annulated | conical                    |
| <i>Paralongicyatholaimus macramphis</i>  | 3 | 2A | spiral                 | punctated/annulated | elongated/filiform         |
| <i>Paralongicyatholaimus sp.</i>         | 3 | 2A | spiral                 | punctated/annulated | elongated/filiform         |
| <i>Paramesacanthion sp.</i>              | 2 | 2B | indistinct             | smooth              | clavate/conico-cylindrical |
| <i>Paramicrolaimus sp.</i>               | 3 | 2A | circular               | punctated/annulated | conical                    |

|                                      |   |    |                        |                     |                            |
|--------------------------------------|---|----|------------------------|---------------------|----------------------------|
| <i>Paramonohystera levicula</i>      | 2 | 1B | circular               | punctated/annulated | clavate/conico-cylindrical |
| <i>Paramonohystera proteus</i>       | 2 | 1B | circular               | punctated/annulated | clavate/conico-cylindrical |
| <i>Paranticoma</i> sp.               | 2 | 1B | pocket                 | smooth              | elongated/filiform         |
| <i>Parapomponema hastatum</i>        | 3 | 2A | spiral                 | punctated/annulated | clavate/conico-cylindrical |
| <i>Pareudesmoscolex</i> sp.          | 4 | 1A | circular               | punctated/annulated | conical                    |
| <i>Pareurystomina acuminata</i>      | 4 | 2B | spiral                 | smooth              | conical                    |
| <i>Pareurystomina</i> sp.            | 4 | 2B | spiral                 | smooth              | conical                    |
| <i>Parodontophora cobbi</i>          | 2 | 2B | rounded/elongated loop | punctated/annulated | clavate/conico-cylindrical |
| <i>Parodontophora</i> sp.            | 2 | 2B | rounded/elongated loop | punctated/annulated | clavate/conico-cylindrical |
| <i>Parodontophora xenotricha</i>     | 2 | 2B | rounded/elongated loop | punctated/annulated | clavate/conico-cylindrical |
| <i>Paroxystomina asymmetrica</i>     | 4 | 1A | pocket                 | punctated/annulated | conical                    |
| <i>Paroxystomina micoletzkyi</i>     | 4 | 1A | pocket                 | punctated/annulated | conical                    |
| <i>Perspiria</i> sp.                 | 3 | 2A | spiral                 | punctated/annulated | conical                    |
| <i>Phanoderma albidum</i>            | 4 | 2A | pocket                 | smooth              | clavate/conico-cylindrical |
| <i>Phanoderma laticolle</i>          | 4 | 2A | pocket                 | smooth              | clavate/conico-cylindrical |
| <i>Phanoderma serratum</i>           | 4 | 2A | pocket                 | smooth              | clavate/conico-cylindrical |
| <i>Phanoderma</i> sp.                | 4 | 2A | pocket                 | smooth              | clavate/conico-cylindrical |
| <i>Phanoderma unica</i>              | 4 | 2A | pocket                 | smooth              | clavate/conico-cylindrical |
| <i>Phanodermella flagellicaudata</i> | 4 | 2A | pocket                 | smooth              | elongated/filiform         |
| <i>Phanodermella</i> sp.             | 4 | 2A | pocket                 | smooth              | elongated/filiform         |
| <i>Phanodermopsis longisetae</i>     | 4 | 1A | pocket                 | smooth              | clavate/conico-cylindrical |
| <i>Phanodermopsis</i> sp.            | 4 | 1A | pocket                 | smooth              | clavate/conico-cylindrical |
| <i>Pierrickia decasetosa</i>         | 2 | 1A | spiral                 | punctated/annulated | clavate/conico-cylindrical |
| <i>Pierrickia</i> sp.                | 2 | 1A | spiral                 | punctated/annulated | clavate/conico-cylindrical |
| <i>Platycoma cephalata</i>           | 3 | 2A | pocket                 | smooth              | conical                    |
| <i>Platycoma sudafricana</i>         | 3 | 2A | pocket                 | smooth              | conical                    |
| <i>Platycomopsis</i> sp.             | 3 | 1A | pocket                 | smooth              | short/blunt                |
| <i>Polygastrophora maior</i>         | 4 | 2B | spiral                 | smooth              | clavate/conico-cylindrical |
| <i>Polygastrophora</i> sp.           | 4 | 2B | spiral                 | smooth              | clavate/conico-cylindrical |
| <i>Pomponema clavicaudatum</i>       | 4 | 2A | spiral                 | punctated/annulated | clavate/conico-cylindrical |
| <i>Pomponema concinnum</i>           | 4 | 2A | spiral                 | punctated/annulated | clavate/conico-cylindrical |

|                                      |   |    |                        |                                                   |                            |
|--------------------------------------|---|----|------------------------|---------------------------------------------------|----------------------------|
| <i>Pomponema sp.</i>                 | 4 | 2A | spiral                 | punctated/annulated                               | clavate/conico-cylindrical |
| <i>Pontonema sp.</i>                 | 4 | 2B | pocket                 | smooth                                            | conical                    |
| <i>Procamacolaimus papillosus</i>    | 3 | 2A | circular               | punctated/annulated                               | conical                    |
| <i>Prochaetosoma sp.</i>             | 4 | 1A | rounded/elongated loop | punctated/annulated                               | conical                    |
| <i>Prochromadora sp.</i>             | 3 | 2A | slit-like              | punctated/annulated                               | conical                    |
| <i>Prochromadora trisupplementa</i>  | 3 | 2A | slit-like              | punctated/annulated                               | conical                    |
| <i>Prochromadorella ditlevseni</i>   | 3 | 2A | slit-like              | punctated/annulated                               | conical                    |
| <i>Prochromadorella salpingifera</i> | 3 | 2A | slit-like              | punctated/annulated                               | conical                    |
| <i>Promonhystera faber</i>           | 2 | 1B | circular               | punctated/annulated                               | clavate/conico-cylindrical |
| <i>Promonhystera sp.</i>             | 2 | 1B | circular               | punctated/annulated                               | clavate/conico-cylindrical |
| <i>Prooncholaimus ornatus</i>        | 4 | 2B | pocket                 | smooth                                            | clavate/conico-cylindrical |
| <i>Protricoma sp.</i>                | 4 | 1A | circular               | punctated/annulated                               | conical                    |
| <i>Pselionema simile</i>             | 3 | 1A | rounded/elongated loop | body annules w/ ridges                            | conical                    |
| <i>Pselionema sp.</i>                | 3 | 1A | rounded/elongated loop | body annules w/ ridges                            | conical                    |
| <i>Pseudaraeolaimus sp.</i>          | 3 | 1A | rounded/elongated loop | punctated/annulated                               | conical                    |
| <i>Pseudoterschellingia ibarrae</i>  | 3 | 1A | circular               | punctated/annulated                               | clavate/conico-cylindrical |
| <i>Pternepsilonema sp.</i>           | 4 | 1A | spiral                 | punctated/annulated                               | conical                    |
| <i>Ptycholaimellus sp.</i>           | 3 | 2A | indistinct             | punctated/annulated                               | conical                    |
| <i>Quadricoma sp.</i>                | 4 | 1A | circular               | desmens                                           | conical                    |
| <i>Retrotheristus breviseta</i>      | 2 | 1B | indistinct             | punctated/annulated                               | clavate/conico-cylindrical |
| <i>Rhinema retrorsum</i>             | 3 | 2A | circular               | punctated/annulated w/<br>longitudinal structures | conical                    |
| <i>Rhinema sp.</i>                   | 3 | 2A | circular               | punctated/annulated w/<br>longitudinal structures | conical                    |
| <i>Rhips anoxybiotica</i>            | 3 | 2A | slit-like              | punctated/annulated                               | conical                    |
| <i>Rhips paraornata</i>              | 3 | 2A | slit-like              | punctated/annulated                               | conical                    |
| <i>Rhips sp.</i>                     | 3 | 2A | slit-like              | punctated/annulated                               | conical                    |
| <i>Richtersia coomansi</i>           | 3 | 1B | spiral                 | punctated/annulated w/<br>longitudinal structures | conical                    |
| <i>Richtersia pilosa</i>             | 3 | 1B | spiral                 | punctated/annulated w/<br>longitudinal structures | conical                    |
| <i>Robbea porosum</i>                | 3 | 1A | spiral                 | bacteria covering                                 | conical                    |

|                                    |   |    |           |                     |                            |
|------------------------------------|---|----|-----------|---------------------|----------------------------|
| <i>Robbea</i> sp.                  | 3 | 1A | spiral    | bacteria covering   | conical                    |
| <i>Sabatieria armata</i>           | 2 | 1B | spiral    | punctated/annulated | clavate/conico-cylindrical |
| <i>Sabatieria praedatrix</i>       | 2 | 1B | spiral    | punctated/annulated | clavate/conico-cylindrical |
| <i>Sabatieria pulchra</i>          | 2 | 1B | spiral    | punctated/annulated | clavate/conico-cylindrical |
| <i>Sabatieria</i> sp.              | 2 | 1B | spiral    | punctated/annulated | clavate/conico-cylindrical |
| <i>Scaptrella cincta</i>           | 2 | 2B | circular  | punctated/annulated | elongated/filiform         |
| <i>Setoplectus</i> sp.             | 3 | 1A | circular  | punctated/annulated | conical                    |
| <i>Setosabatieria hilarula</i>     | 2 | 1B | spiral    | punctated/annulated | clavate/conico-cylindrical |
| <i>Setosabatieria</i> sp.          | 2 | 1B | spiral    | punctated/annulated | clavate/conico-cylindrical |
| <i>Siphonolaimus</i> sp.           | 3 | 1A | circular  | punctated/annulated | conical                    |
| <i>Southerniella allometrica</i>   | 3 | 1A | circular  | punctated/annulated | conical                    |
| <i>Southerniella</i> sp.           | 3 | 1A | circular  | punctated/annulated | conical                    |
| <i>Sphaerolaimus macrocirculus</i> | 3 | 2B | Circular  | punctated/annulated | clavate/conico-cylindrical |
| <i>Sphaerolaimus maeoticus</i>     | 3 | 2B | Circular  | punctated/annulated | clavate/conico-cylindrical |
| <i>Sphaerolaimus</i> sp.           | 3 | 2B | Circular  | punctated/annulated | clavate/conico-cylindrical |
| <i>Spiliphera dolichura</i>        | 3 | 2A | spiral    | punctated/annulated | elongated/filiform         |
| <i>Spiliphera</i> sp.              | 3 | 2A | spiral    | punctated/annulated | elongated/filiform         |
| <i>Spilophorella candida</i>       | 2 | 2A | slit-like | punctated/annulated | conical                    |
| <i>Spilophorella paradoxa</i>      | 2 | 2A | slit-like | punctated/annulated | conical                    |
| <i>Spilophorella</i> sp.           | 2 | 2A | slit-like | punctated/annulated | conical                    |
| <i>Spirinia hamata</i>             | 3 | 2A | spiral    | punctated/annulated | conical                    |
| <i>Spirinia inaurita</i>           | 3 | 2A | spiral    | punctated/annulated | conical                    |
| <i>Spirinia parasitifera</i>       | 3 | 2A | spiral    | punctated/annulated | conical                    |
| <i>Spirinia</i> sp.                | 3 | 2A | spiral    | punctated/annulated | conical                    |
| <i>Spirobolbolaimus bathyalis</i>  | 3 | 2A | spiral    | punctated/annulated | conical                    |
| <i>Steineria</i> sp.               | 2 | 1B | circular  | punctated/annulated | elongated/filiform         |
| <i>Steineria sterreri</i>          | 2 | 1B | circular  | punctated/annulated | elongated/filiform         |
| <i>Stilbonema annulatum</i>        | 3 | 1A | spiral    | bacteria covering   | conical                    |
| <i>Stilbonema brevicolle</i>       | 3 | 1A | spiral    | bacteria covering   | conical                    |
| <i>Stygodesmodora</i> sp.          | 3 | 2A | spiral    | punctated/annulated | conical                    |
| <i>Stylotheristus mutilus</i>      | 2 | 1B | circular  | punctated/annulated | elongated/filiform         |

|                                      |   |    |                        |                     |                            |
|--------------------------------------|---|----|------------------------|---------------------|----------------------------|
| <i>Stylotheristus</i> sp.            | 2 | 1B | circular               | punctated/annulated | elongated/filiform         |
| <i>Symplocostoma</i> sp.             | 4 | 2B | pocket                 | smooth              | conical                    |
| <i>Symplocostoma tenuicolle</i>      | 4 | 2B | pocket                 | smooth              | conical                    |
| <i>Synonchiella hopperi</i>          | 3 | 2B | spiral                 | punctated/annulated | clavate/conico-cylindrical |
| <i>Synonchiella micramphis</i>       | 3 | 2B | spiral                 | punctated/annulated | clavate/conico-cylindrical |
| <i>Synonchiella riemanni</i>         | 3 | 2B | spiral                 | punctated/annulated | clavate/conico-cylindrical |
| <i>Synonchiella</i> sp.              | 3 | 2B | spiral                 | punctated/annulated | conical                    |
| <i>Synonchium</i> sp.                | 3 | 2B | spiral                 | punctated/annulated | short/blunt                |
| <i>Synonchus fasciculatus</i>        | 5 | 2A | pocket                 | smooth              | short/blunt                |
| <i>Synonchus</i> sp.                 | 5 | 2A | pocket                 | smooth              | short/blunt                |
| <i>Synonema ochrum</i>               |   | 2A | circular               | punctated/annulated | conical                    |
| <i>Synonema</i> sp.                  |   | 2A | circular               | punctated/annulated | conical                    |
| <i>Syringolaimus annae</i>           | 4 | 2B | pocket                 | punctated/annulated | elongated/filiform         |
| <i>Syringolaimus flicaudatus</i>     | 4 | 2B | pocket                 | punctated/annulated | elongated/filiform         |
| <i>Syringolaimus striatocaudatus</i> | 4 | 2B | pocket                 | punctated/annulated | elongated/filiform         |
| <i>Tarvaia</i> sp.                   |   | 1B | rounded/elongated loop | punctated/annulated | conical                    |
| <i>Terschellingia communis</i>       | 3 | 1A | circular               | punctated/annulated | clavate/conico-cylindrical |
| <i>Terschellingia goubaultae</i>     | 3 | 1A | circular               | punctated/annulated | clavate/conico-cylindrical |
| <i>Terschellingia longicaudata</i>   | 3 | 1A | circular               | punctated/annulated | elongated/filiform         |
| <i>Terschellingia</i> sp.            | 3 | 1A | circular               | punctated/annulated | clavate/conico-cylindrical |
| <i>Thalassironus britannicus</i>     | 4 | 2B | pocket                 | punctated/annulated | clavate/conico-cylindrical |
| <i>Thalassironus lynnae</i>          | 4 | 2B | pocket                 | punctated/annulated | elongated/filiform         |
| <i>Thalassironus</i> sp.             | 4 | 2B | pocket                 | punctated/annulated | elongated/filiform         |
| <i>Thalassoalaimus</i> sp.           | 4 | 1A | pocket                 | punctated/annulated | conical                    |
| <i>Thalassoalaimus tardus</i>        | 4 | 1A | pocket                 | punctated/annulated | conical                    |
| <i>Theristus copulatus</i>           | 2 | 1B | circular               | punctated/annulated | conical                    |
| <i>Theristus ensifer</i>             | 2 | 1B | circular               | punctated/annulated | conical                    |
| <i>Theristus otoplanobius</i>        | 2 | 1B | circular               | punctated/annulated | conical                    |
| <i>Theristus</i> sp.                 | 2 | 1B | circular               | punctated/annulated | conical                    |
| <i>Trefusialaimus monorchis</i>      | 4 | 1A | pocket                 | smooth              | clavate/conico-cylindrical |
| <i>Trefusialaimus</i> sp.            | 4 | 1A | pocket                 | smooth              | clavate/conico-cylindrical |

|                                 |   |    |            |                                                   |                            |
|---------------------------------|---|----|------------|---------------------------------------------------|----------------------------|
| <i>Tricoma fisheri</i>          | 4 | 1A | circular   | desmens                                           | conical                    |
| <i>Tricoma similis</i>          | 4 | 1A | circular   | desmens                                           | conical                    |
| <i>Tricoma sp.</i>              | 4 | 1A | circular   | desmens                                           | conical                    |
| <i>Trileptium otti</i>          | 2 | 2B | indistinct | smooth                                            | clavate/conico-cylindrical |
| <i>Trischistoma monohystera</i> | 4 | 1A | pocket     | smooth                                            | conical                    |
| <i>Trochamus carinatus</i>      | 3 | 2A | slit-like  | punctated/annulated                               | conical                    |
| <i>Vasostoma sp.</i>            | 2 | 2A | spiral     | punctated/annulated                               | clavate/conico-cylindrical |
| <i>Viscosia abyssorum</i>       | 3 | 2B | pocket     | smooth                                            | clavate/conico-cylindrical |
| <i>Viscosia glabra</i>          | 3 | 2B | pocket     | smooth                                            | elongated/filiform         |
| <i>Viscosia langrunensis</i>    | 3 | 2B | pocket     | smooth                                            | clavate/conico-cylindrical |
| <i>Viscosia sp.</i>             | 3 | 2B | pocket     | smooth                                            | clavate/conico-cylindrical |
| <i>Viscosia viscosa</i>         | 3 | 2B | pocket     | smooth                                            | clavate/conico-cylindrical |
| <i>Xennella cephalata</i>       | 4 | 1A | pocket     | punctated/annulated                               | elongated/filiform         |
| <i>Xyala sp.</i>                | 2 | 2A | circular   | punctated/annulated w/<br>longitudinal structures | conical                    |
| <i>Zalonema ditlevseni</i>      | 3 | 2A | spiral     | punctated/annulated                               | conical                    |
| <i>Zalonema maldivensis</i>     | 3 | 2A | spiral     | punctated/annulated                               | conical                    |

## References

1. Pérez-García, J.A.; Ruiz-Abierno, A.; Armenteros, M. Does morphology of host marine macroalgae drive the ecological structure of epiphytic meiofauna? *J. Mar. Biol. Oceanogr.* **2015**, *4*, 7.
2. Pérez-García, J.A.; Díaz-Delgado, Y.; García-Machado, E.; Martínez-García, A.; Gonzalez, B.C.; Worsaae, K.; Armenteros, M. Nematode diversity of freshwater and anchialine caves of Western Cuba. *Proc. Biol. Soc. Wash.* **2018**, *131*, 144–155.
3. Armenteros, M.; Ruiz-Abierno, A.; Fernández-Garcés, R.; Pérez-García, J.A.; Díaz-Asencio, L.; Vincx, M.; Decraemer, W. Biodiversity patterns of free-living marine nematodes in a tropical bay: Cienfuegos, Caribbean Sea. *Estuar. Coast. Shelf Sci.* **2009**, *85*, 179–189, doi:10.1016/j.ecss.2009.08.002.
4. Pérez-García, J.A.; Marzo-Pérez, D.; Armenteros, M. Spatial scale influences diversity patterns of free-living nematode assemblages in coral degradation zones from the Caribbean Sea. *Mar. Biodivers.* **2019**, *49*, 1831–1842, doi:10.1007/s12526-019-00945-z.
5. Ruiz-Abierno, A.; Armenteros, M. Coral reef habitats strongly influence the diversity of macro and meiobenthos in the Caribbean. *Mar. Biodivers.* **2017**, *47*, 101–111, doi:10.1007/s12526-016-0553-7.
